# Supplementary material for: Ti3C2Tx MXene-based hybrid nanocoating for flame retardant, early fire-warning and piezoresistive tension sensing smart polyester fabrics
Source: Royal Society of Chemistry journal article supplement (doi:10.1039/d3nr06604e), 2024-01-01
Supplement: d3nr06604e4.pdf [file d3nr06604e4.pdf]

## Supporting Information

### **Ti<sub>3</sub>C<sub>2</sub>T<sub>x</sub> MXene-based hybrid nanocoating towards flame retardant, fire early-warning and piezoresistive tension sensing smart polyester fabric**

Menghan Guo<sup>a</sup>, Wenqing Wang<sup>a, b\*</sup>, Bin Zhai<sup>c</sup>, Jingtao Li<sup>a</sup>, Liran Zhang<sup>a, b</sup>, Jingchun Li<sup>a</sup>, Kexin Luo<sup>a</sup>, Rui Wang<sup>a, b</sup>

<sup>a</sup>Materials Design & Engineering Department, Beijing Institute of Fashion Technology, Beijing 100029, China

<sup>b</sup>Beijing Key Laboratory of Clothing Materials R&D and Assessment, Beijing Engineering Research Center of Textile Nanofiber, Beijing Institute of Fashion Technology, Beijing 100029, China

<sup>c</sup>No.5 Geological Brigade of Shandong Provincial Bureau of Geology and Mineral Resources, Taian, Shandong 271000, China

\*20180021@bift.edu.cn

## Content

|                                                                                                                              |   |
|------------------------------------------------------------------------------------------------------------------------------|---|
| <b>Fig.S1.</b> Photos of the fire warning device (a) and heating plate (b). .....                                            | 3 |
| <b>Fig.S2.</b> Q-MXene suspension for different days. ....                                                                   | 3 |
| <b>Fig.S3.</b> SEM-EDS mapping images of the (a) FPP, (b) FPP@AM-3, (c) FPP@PM-3 and (d) FPP@A5-M1 for the chosen zone. .... | 3 |
| <b>Fig.S4.</b> High resolution XPS spectra of P 2p region on (a) FPP@AM-3, (b) FPP@PM-3, and (c) FPP@A5-M1. ....             | 4 |
| <b>Fig.S5.</b> TG (a) and DTG (b) curves for FRPET, FPP, FPP@PM-3, FPP@AM-3, and FPP@A5-M1. ....                             | 4 |
| <b>Fig.S6.</b> The weight loss with washing time increasing for modified FPP fabric. ....                                    | 4 |
| <b>Fig.S7.</b> Initial, ignition and extinguishing times of FPP fabric. ....                                                 | 5 |
| <b>Fig.S8.</b> Limiting oxygen values for FRPET and FPP@A5-M1. ....                                                          | 5 |
| <b>Fig.S9.</b> Thermal infrared images of FRPET, FPP@PM-3, FPP@AM-3 and FPP@A5-M1 fabric at different combustion time. ....  | 6 |
| <b>Fig.S10.</b> MXene-based fabric Cone Volume Data. presented (a) pHRR and (b) TSP curves. ....                             | 7 |
| <b>Fig.S11.</b> The char residual (a) SEM and (b) Raman plots of FPP fabric. ....                                            | 7 |
| <b>Fig.S12.</b> FPP@A5-M1 carbon residue resistance. ....                                                                    | 8 |
| <b>Table S1.</b> The EDS elemental content of modified FRPET fabric. ....                                                    | 9 |
| <b>Table S2.</b> The value of $\Delta U$ at $\Delta T=130$ °C for FPP@A5-M1. ....                                            | 9 |
| <b>Table S3.</b> Cone calorimeter test for pristine FRPET and its modified fabric. ....                                      | 9 |

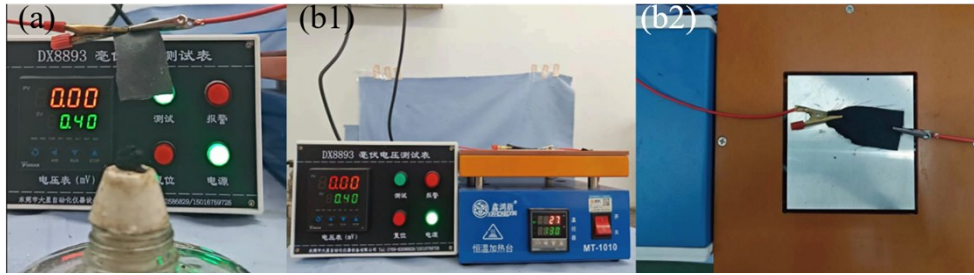

**Fig.S1.** Photos of the fire warning device (a) and heating plate (b).

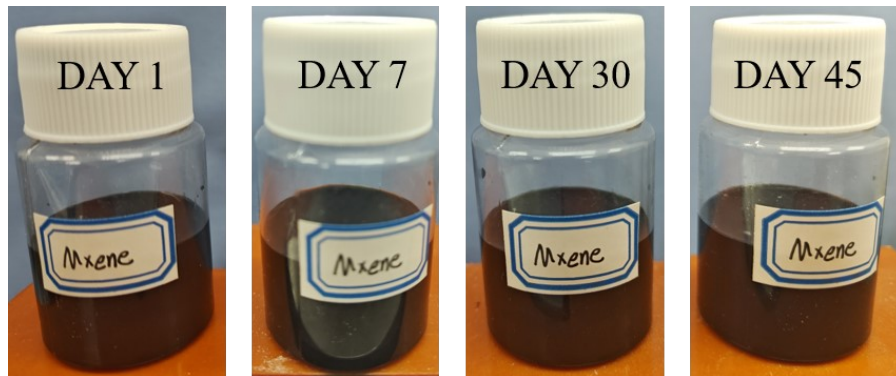

**Fig.S2.** Q-MXene suspension for different days.

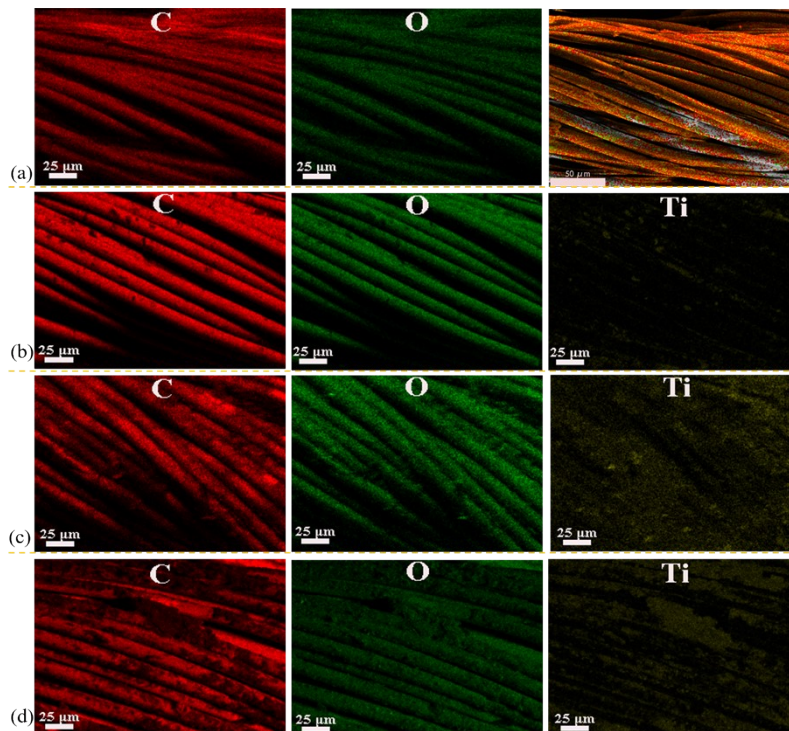

**Fig.S3.** SEM-EDS mapping images of the (a) FPP, (b) FPP@AM-3, (c) FPP@PM-3 and (d) FPP@A5-M1 for the chosen zone.

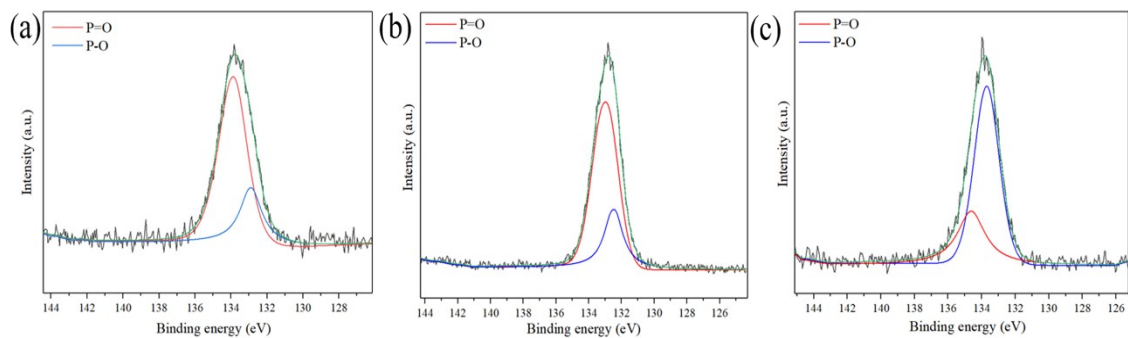

**Fig.S4.** High resolution XPS spectra of P 2p region on (a) FPP@AM-3, (b) FPP@PM-3, and (c) FPP@A5-M1.

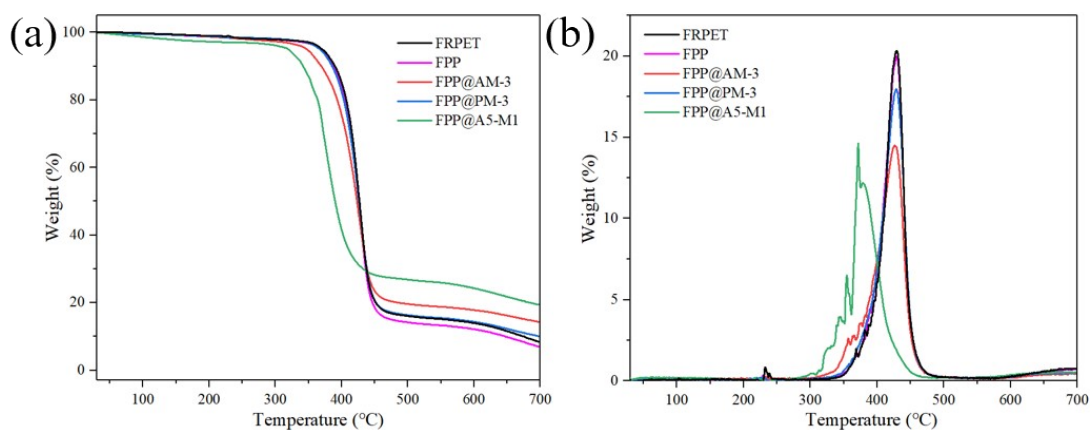

**Fig.S5.** TG (a) and DTG (b) curves for FRPET, FPP, FPP@PM-3, FPP@AM-3, and FPP@A5-M1.

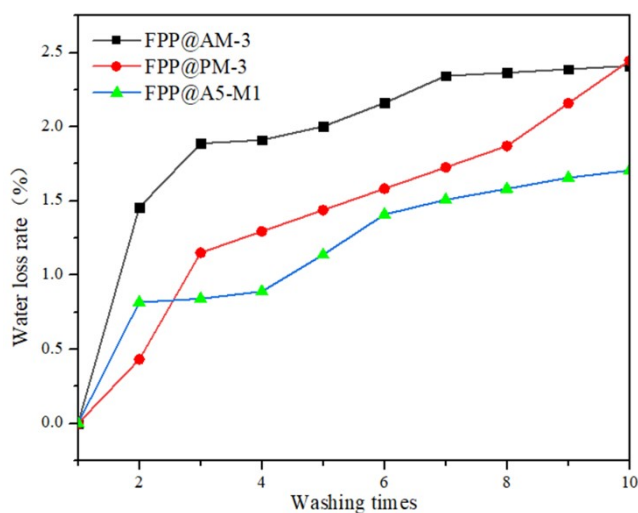

**Fig.S6.** The weight loss with washing time increasing for modified FPP fabric.

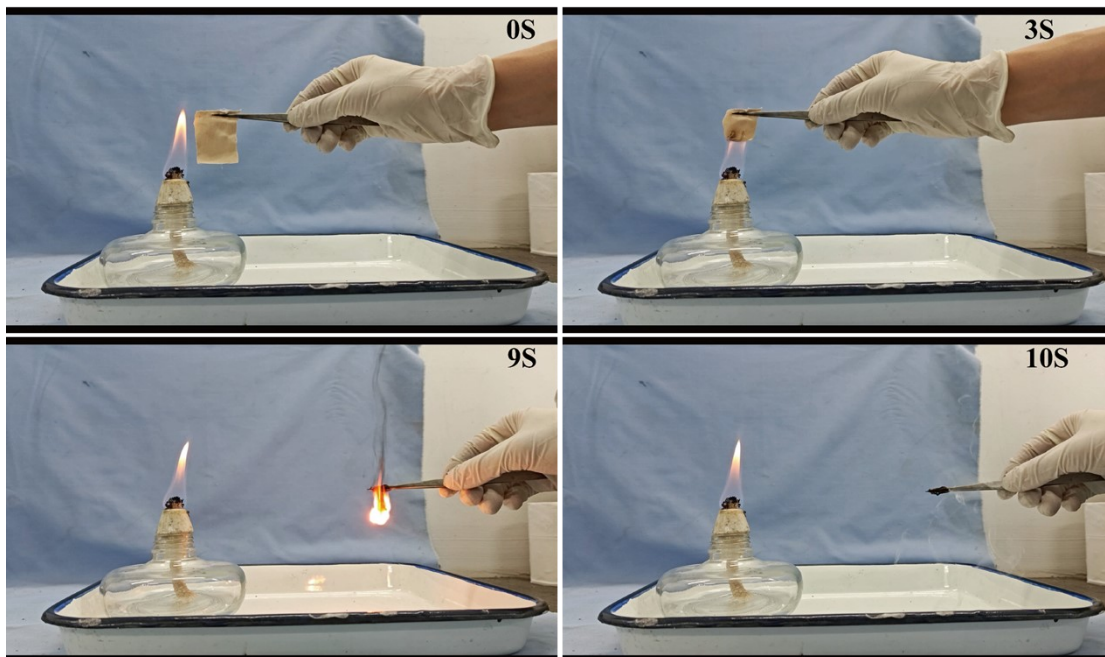

**Fig.S7.** Initial, ignition and extinguishing times of FPP fabric.

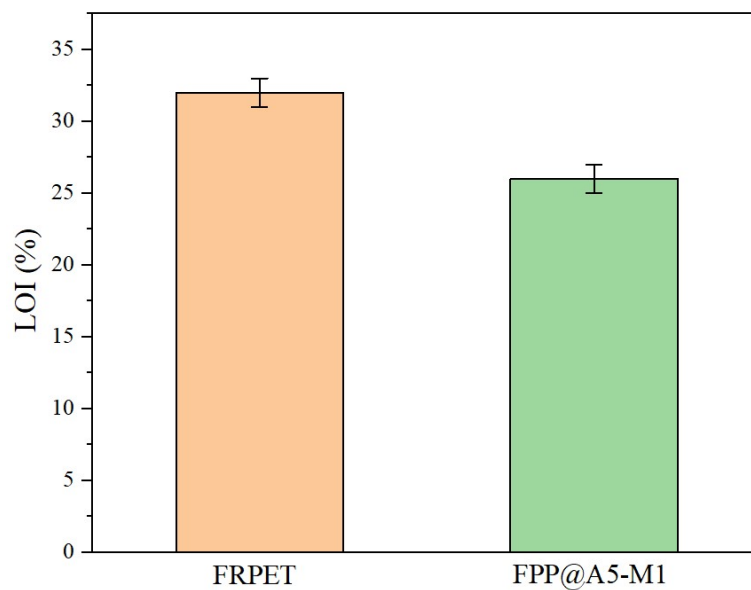

**Fig.S8.** Limiting oxygen values for FRPET and FPP@A5-M1.

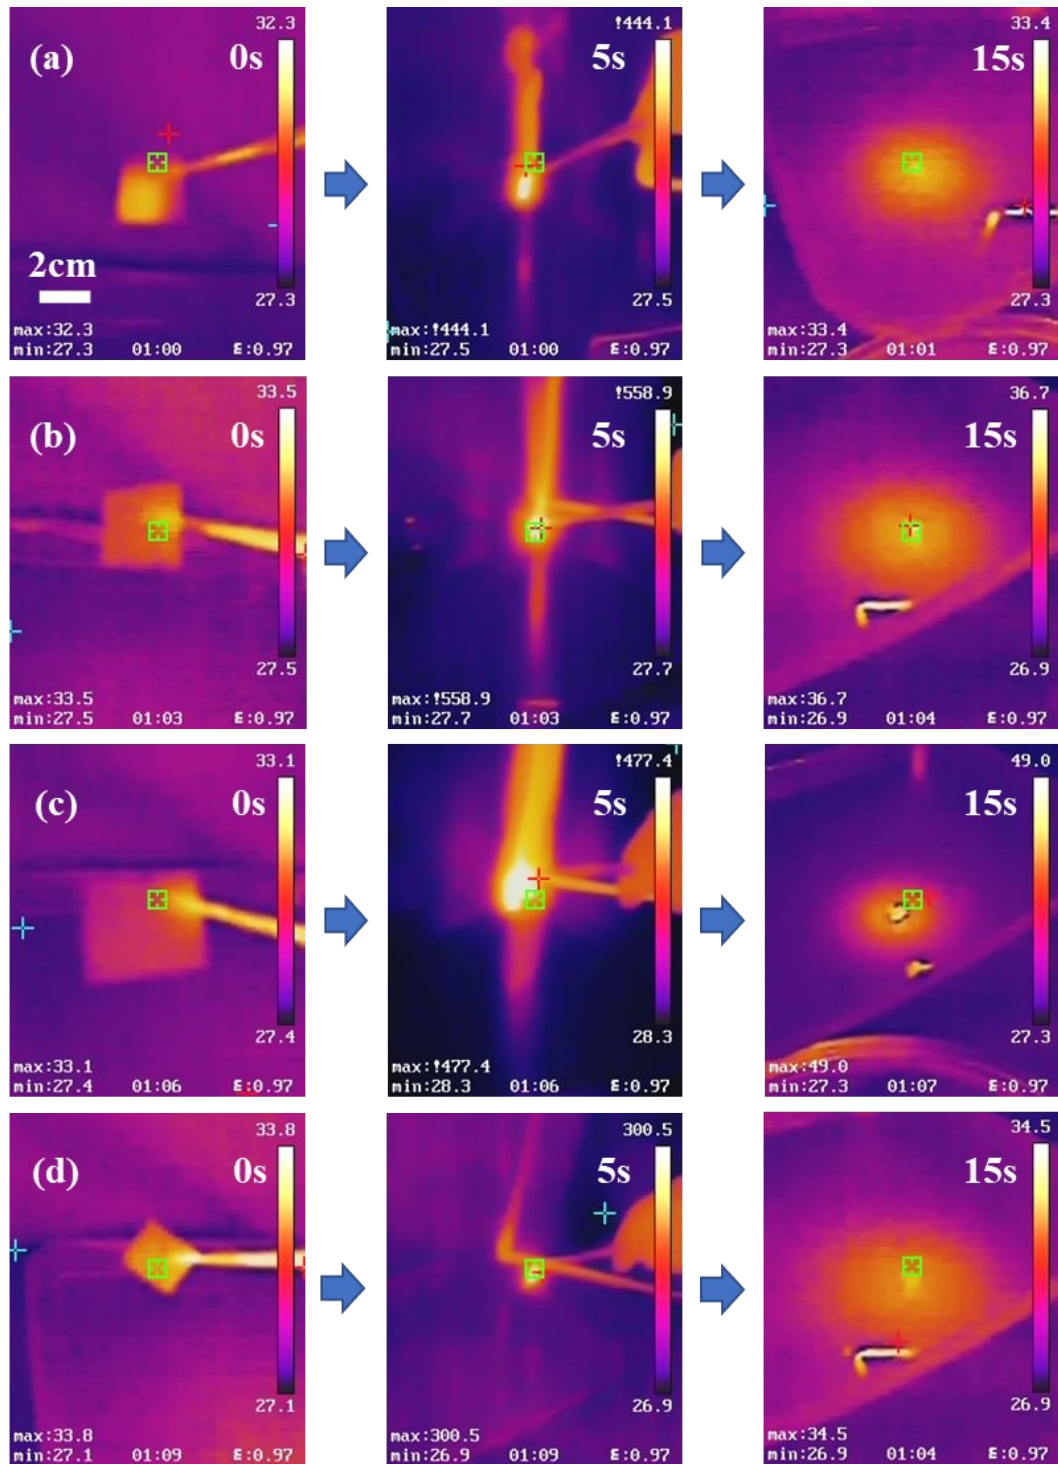

**Fig.S9.** Thermal infrared images of FRPET, FPP@PM-3, FPP@AM-3 and FPP@A5-M1 fabric at different combustion time.

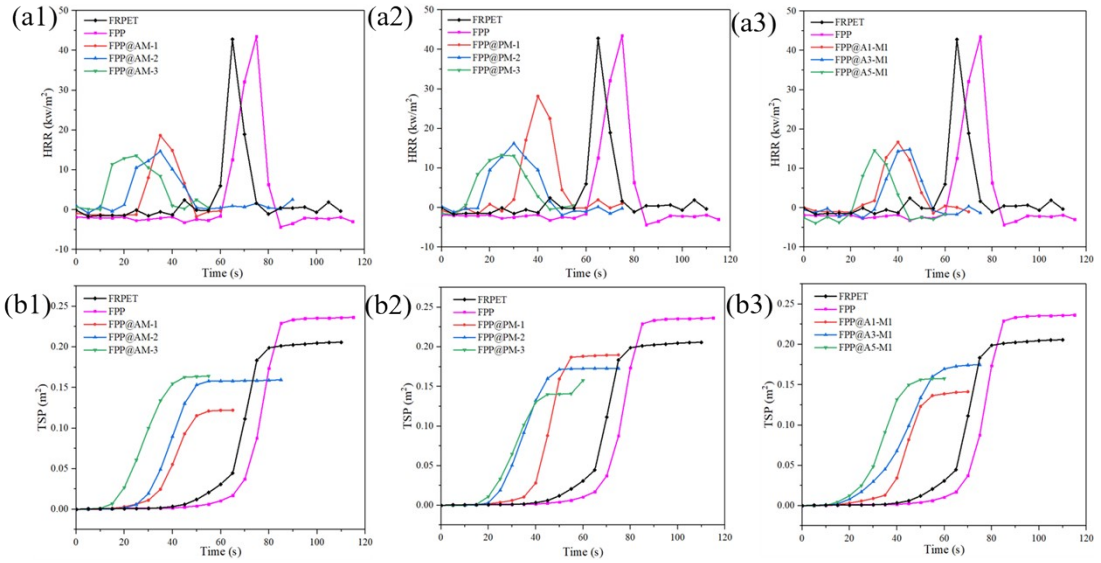

**Fig.S10.** MXene-based fabric Cone Volume Data. presented (a) pHRR and (b) TSP curves.

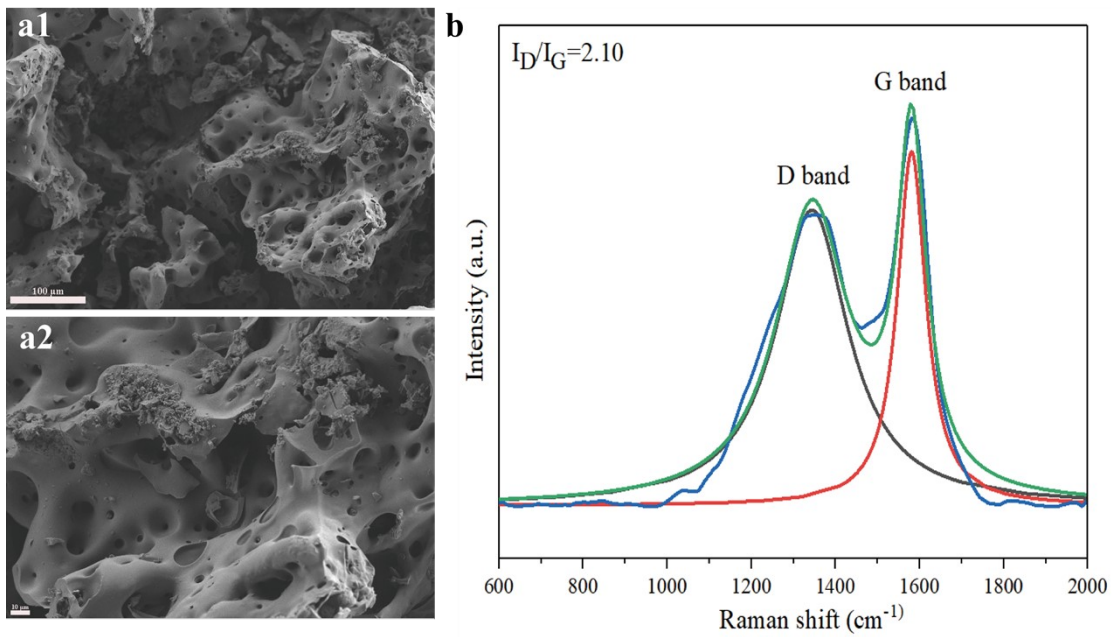

**Fig.S11.** The char residual (a) SEM and (b) Raman plots of FPP fabric.

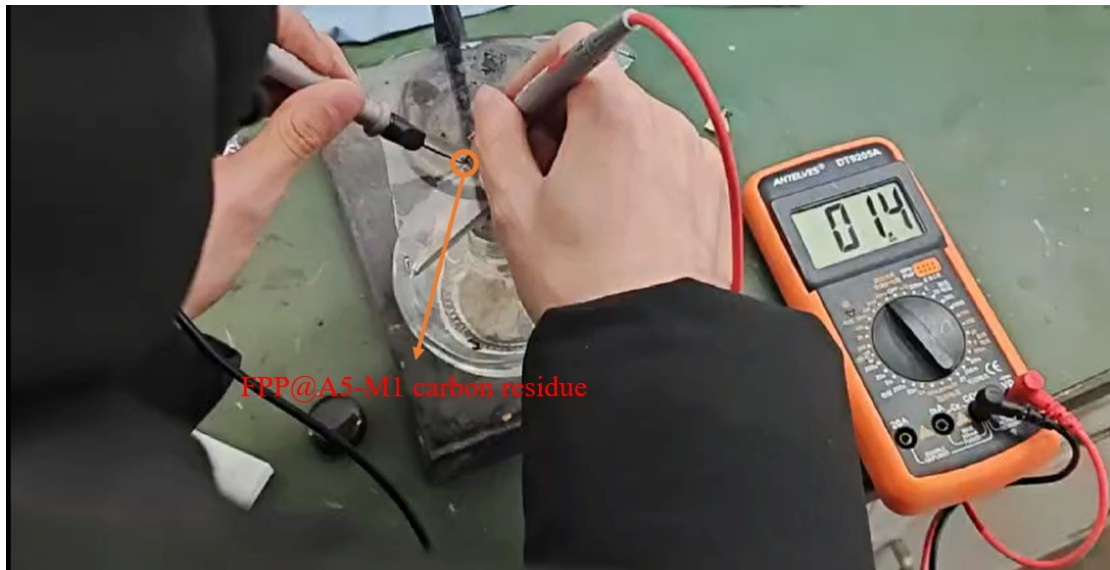

**Fig.S12.** FPP@A5-M1 carbon residue resistance.



**Table S1.** The EDS elemental content of modified FRPET fabric.

| Sample                 | FPP@AM-3 | FPP@PM-3 | FPP@A5-M1 |
|------------------------|----------|----------|-----------|
| carbon content (%)     | 57.5     | 42.63    | 61.96     |
| Phosphorus content (%) | 3.95     | 11.69    | 3.92      |

**Table S2.** The value of  $\Delta U$  at  $\Delta T=130$  °C for FPP@A5-M1

| Washing times   | 1    | 2    | 4    | 6    |
|-----------------|------|------|------|------|
| $\Delta U$ (mV) | 0.48 | 0.46 | 0.34 | 0.35 |

**Table S3.** Cone calorimeter test for pristine FRPET and its modified fabric.

| Sample           | TTI | PHRR<br>(KW/m <sup>2</sup> ) | THR<br>(MJ/m <sup>2</sup> ) | TSP<br>(m <sup>2</sup> ) |
|------------------|-----|------------------------------|-----------------------------|--------------------------|
| <b>FRPET</b>     | 67  | 18.93                        | 0.2112                      | 0.1567                   |
| <b>FPP</b>       | 66  | 43.47                        | 0.4412                      | 0.2192                   |
| <b>FPP@PM-1</b>  | 37  | 28.17                        | 0.3072                      | 0.1489                   |
| <b>FPP@PM-2</b>  | 21  | 16.25                        | 0.2874                      | 0.1696                   |
| <b>FPP@PM-3</b>  | 18  | 13.25                        | 0.2586                      | 0.1290                   |
| <b>FPP@AM-1</b>  | 33  | 18.65                        | 0.2210                      | 0.1099                   |
| <b>FPP@AM-2</b>  | 29  | 14.68                        | 0.2515                      | 0.1522                   |
| <b>FPP@AM-3</b>  | 17  | 13.57                        | 0.2586                      | 0.1479                   |
| <b>FPP@A3-M1</b> | 40  | 14.84                        | 0.1462                      | 0.1070                   |
| <b>FPP@A5-M1</b> | 32  | 11.00                        | 0.1082                      | 0.1091                   |
